# Supplementary material for: Cisplatin binding to angiogenin protein: new molecular pathways and targets for the drug's anticancer activity
Source: Royal Society of Chemistry journal article supplement (doi:10.1039/d3dt01517c), 2023-01-01
Supplement: d3dt01517c1.pdf [file d3dt01517c1.pdf]

## Supporting Information

### **Cisplatin binding to angiogenin protein: new molecular pathways and targets for the drug anticancer activity**

*Giarita Ferraro,<sup>1</sup> Vanessa Sanfilippo,<sup>2</sup> Lorenzo Chiaverini,<sup>3</sup> Cristina Satriano,<sup>2\*</sup> Tiziano Marzo,<sup>3\*</sup> Antonello Merlino,<sup>1\*</sup> Diego La Mendola<sup>3</sup>*

<sup>1</sup>Department of Chemical Sciences, University of Naples Federico II, via Cintia 21, I-80126 Napoli, Italy.

<sup>2</sup>Nano Hybrid BioInterfaces Laboratory (NHBIL), Department of Chemical Sciences, University of Catania, viale Andrea Doria, 6, 95125 Catania, Italy.

<sup>3</sup>Department of Pharmacy, University of Pisa, via Bonanno Pisano 6, 56126 Pisa, Italy.

\*Correspondence to:

Cristina Satriano ([cristina.satriano@unict.it](mailto:cristina.satriano@unict.it))

Tiziano Marzo ([tiziano.marzo@unipi.it](mailto:tiziano.marzo@unipi.it))

Or Antonello Merlino ([antonello.merlino@unina.it](mailto:antonello.merlino@unina.it))

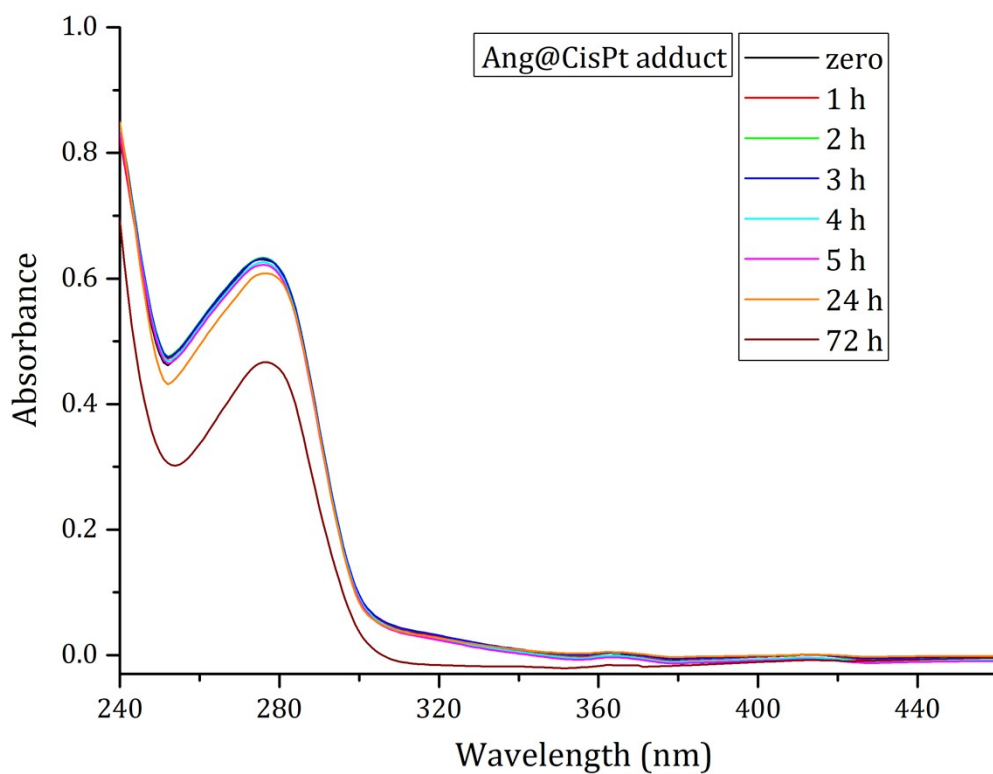

**Figure S1.** UV-vis absorption spectra of the Ang@CisPt adduct obtained upon incubation of the protein with the metal compound in a 1:3 protein to metal molar ratio. Spectra were collected at different incubation times in 20 mM sodium citrate buffer pH 5.1. Experimental settings: protein concentration of  $0.5 \text{ mg mL}^{-1}$  ( $35 \text{ }\mu\text{M}$ ), range 240–500 nm, bandwidth 2.0 nm, scanning speed  $200 \text{ nm min}^{-1}$ , data pitch 1.0 nm, optical path-length quartz cell 0.1 cm.

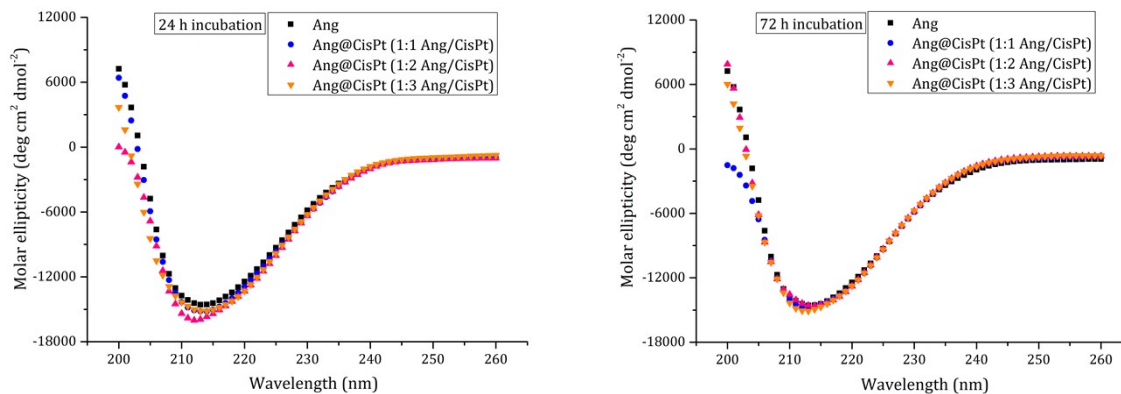

A

B

**Figure S2.** Circular dichroism spectra of the Ang@CisPt adduct obtained upon incubation of the protein with the metal compound at different protein to metal ratio (1:1, 1:2 and 1:3) compared to the spectrum of the metal-free protein (black squares) in 20 mM sodium citrate buffer pH 5.1 after 24 h (panel A) and 72 h (panel B) of incubation at 37 °C. Experimental settings: protein concentration of 0.2 mg mL<sup>-1</sup> (14 μM), range 200-250 nm, scanning speed 50 nm min<sup>-1</sup>, bandwidth 2.0 nm, resolution 1.0 nm, sensitivity 50 mdeg, and response 2 s.

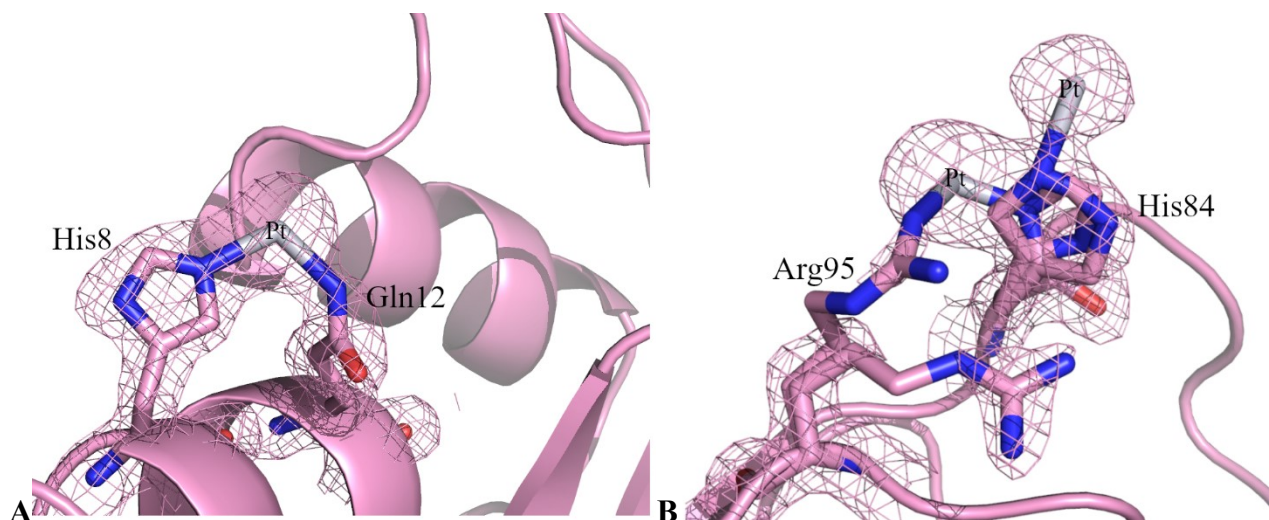

**Figure S3.** Pt binding sites in the structure of oxaliplatin/Ang<sup>23</sup>. The metal center binds the side chains of His8 and Gln12 (A) and His84 and Arg95 (B). 2Fo-Fc electron density maps are contoured at 1.0  $\sigma$  (light pink).

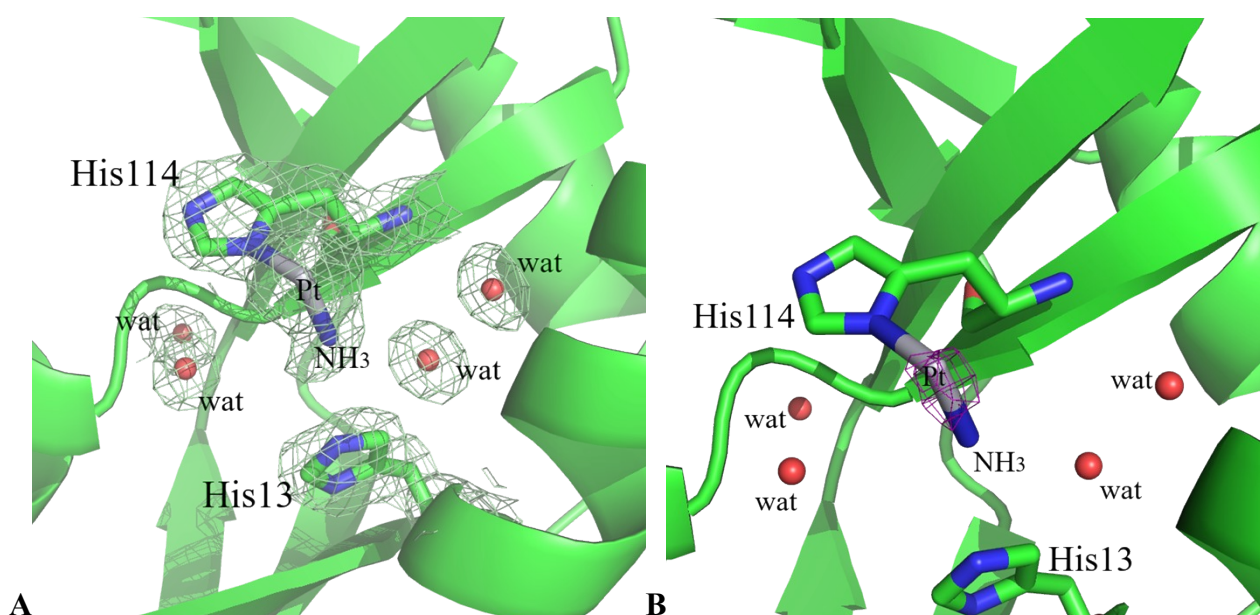

**Figure S4.** Details of the CisPt fragment binding site in the Ang@CisPt adduct formed in a second crystal. In panel A, 2Fo - Fc electron density maps are contoured at the 1.0  $\sigma$  level (green); in panel B anomalous difference electron density map is reported at 2.0  $\sigma$  level (violet).

**Table S1.** Data collection and refinement statistics of the structures of two Ang@CisPt adducts*Data collection*

|                        |                                   |                                   |
|------------------------|-----------------------------------|-----------------------------------|
| PDB code               | 8003                              | 8004                              |
| Soaking time           | 5 days                            | 1 month                           |
| Space group            | P 2 <sub>1</sub> 2 <sub>1</sub> 2 | P 2 <sub>1</sub> 2 <sub>1</sub> 2 |
| a (Å)                  | 85.32                             | 85.25                             |
| b (Å)                  | 37.48                             | 37.51                             |
| c (Å)                  | 38.33                             | 38.16                             |
| α β γ (°)              | 90.0                              | 90.0                              |
| Resolution range (Å)   | 42.66 - 1.76                      | 42.63-1.99                        |
|                        | 1.79-1.76                         | 1.99-2.02                         |
| Observations           | 131250 (3414)                     | 85963 (2091)                      |
| Unique reflections     | 12229 (535)                       | 8572 (414)                        |
| Completeness (%)       | 95.0 (83.2)                       | 96.0 (98.1)                       |
| Redundancy             | 10.7 (6.4)                        | 10.0 (5.1)                        |
| †Rmerge (%)            | 0.083 (0.664)                     | 0.083 (0.581)                     |
| Average I/σ(I)         | 19.1 (2.3)                        | 17.1 (2.4)                        |
| CC <sub>1/2</sub>      | 1.00 (0.856)                      | 0.996 (0.927)                     |
| Anom. completeness (%) | 94.6 (81.7)                       | 95.3 (97.6)                       |
| Anom. Multiplicity     | 5.8 (3.4)                         | 5.5 (2.7)                         |

*Refinement*

|                                             |             |             |
|---------------------------------------------|-------------|-------------|
| Resolution range (Å)                        | 42.66-1.76  | 42.62-1.99  |
| N. of reflections (working set)             | 11495       | 8145        |
| N. of reflections (test set)                | 619         | 557         |
| R-factor/R-free (%)                         | 24.54/29.04 | 31.02/36.72 |
| N. of residues                              | 122         | 122         |
| N. of atoms                                 | 1124        | 1051        |
| Average B-factors (Å <sup>2</sup> )         |             |             |
| All atoms                                   | 20.82       | 23.29       |
| Pt atoms                                    | 47.87       | 63.66       |
| R.m.s. deviations                           |             |             |
| Bond lengths (Å)                            | 0.011       | 0.006       |
| Bond angles (°)                             | 1.724       | 1.526       |
| Ramachandran statistics (Validation Report) |             |             |
| Favoured                                    | 119 (96%)   | 110 (91%)   |
| Allowed                                     | 4 (3%)      | 10 (8%)     |
| Outliers                                    | 1 (1%)      | 1 (1%)      |

†Rmerge =  $\frac{\sum h \sum i |I(h,i) - \langle I(h) \rangle|}{\sum h \sum i I(h,i)}$ , where I(h,i) is the intensity of the i<sup>th</sup> measurement of reflection h and  $\langle I(h) \rangle$  is the mean value of the intensity of reflection h.

Criteria used in determination of resolution cut:

R<sub>pim</sub> ≤ 0.6000

I/σ(I) ≥ 2.00

CC(1/2) ≥ 0.3000

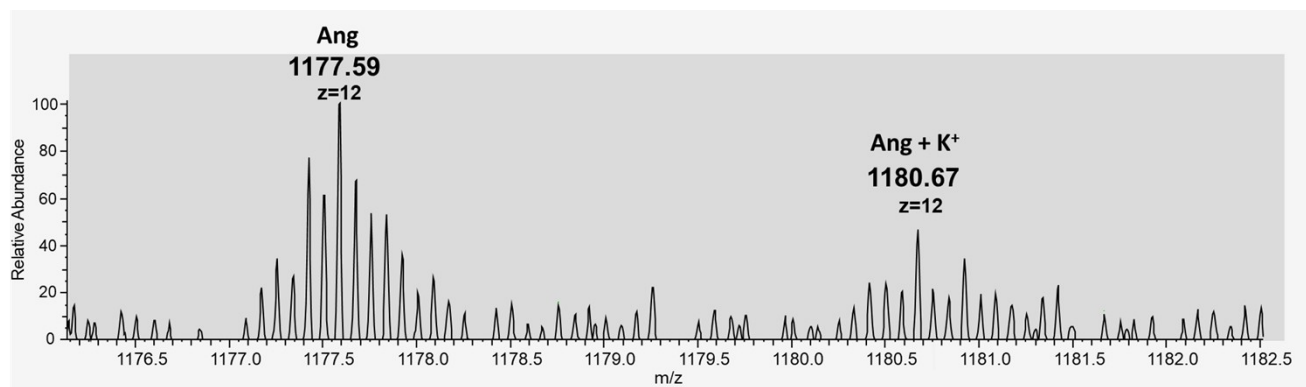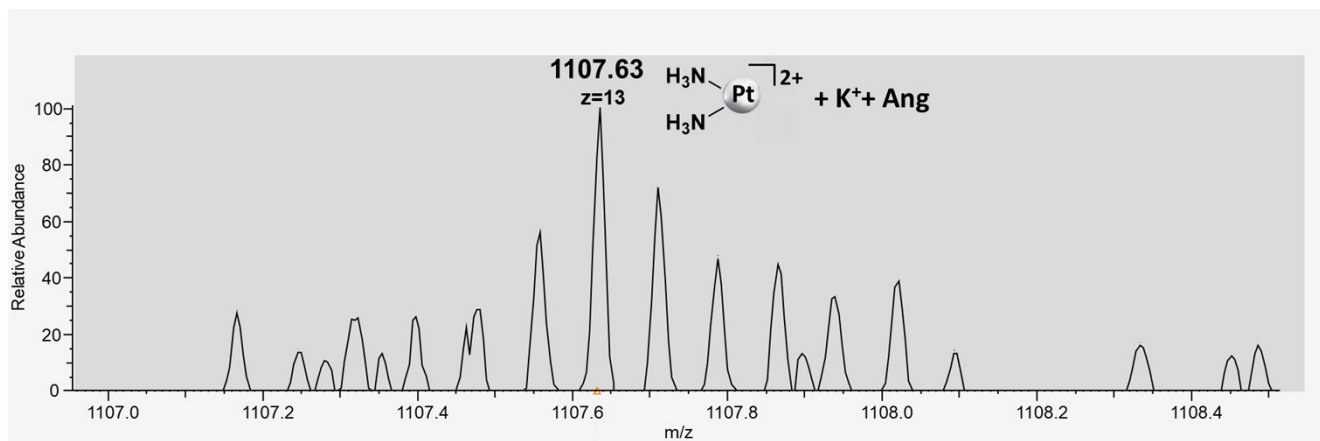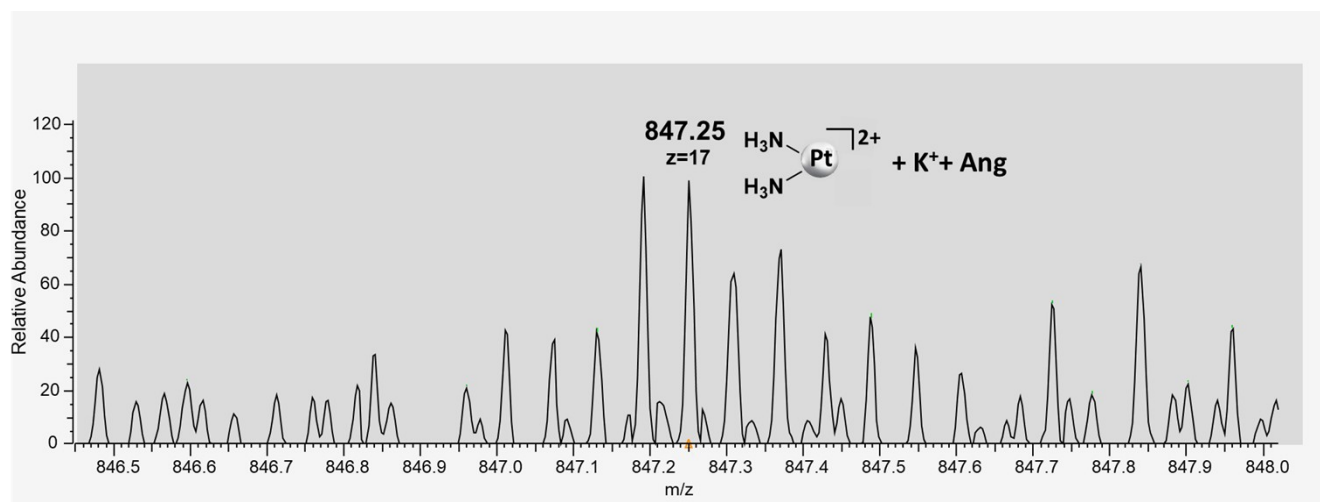

**Figure S5.** Mass spectra of Ang  $10^{-6}$  M in water (top). The peak at  $m/z$  1177.59 corresponds to the protein where the first amino acid residue, i.e. glutamine, is present as pyroglutamic acid. Middle and bottom: Ang ( $10^{-6}$  M) incubated with CisPt (protein to metal molar ratio 1:5) in water at 37 °C for 48 h.
